# Supplementary material for: Impaired detection of omicron by SARS-CoV-2 rapid antigen tests
Source: Springer Nature journal article supplement (doi:10.1007/s00430-022-00730-z), 2022-02-20
Supplement: MOESM1 [file 20149694]

Supplemental Figures

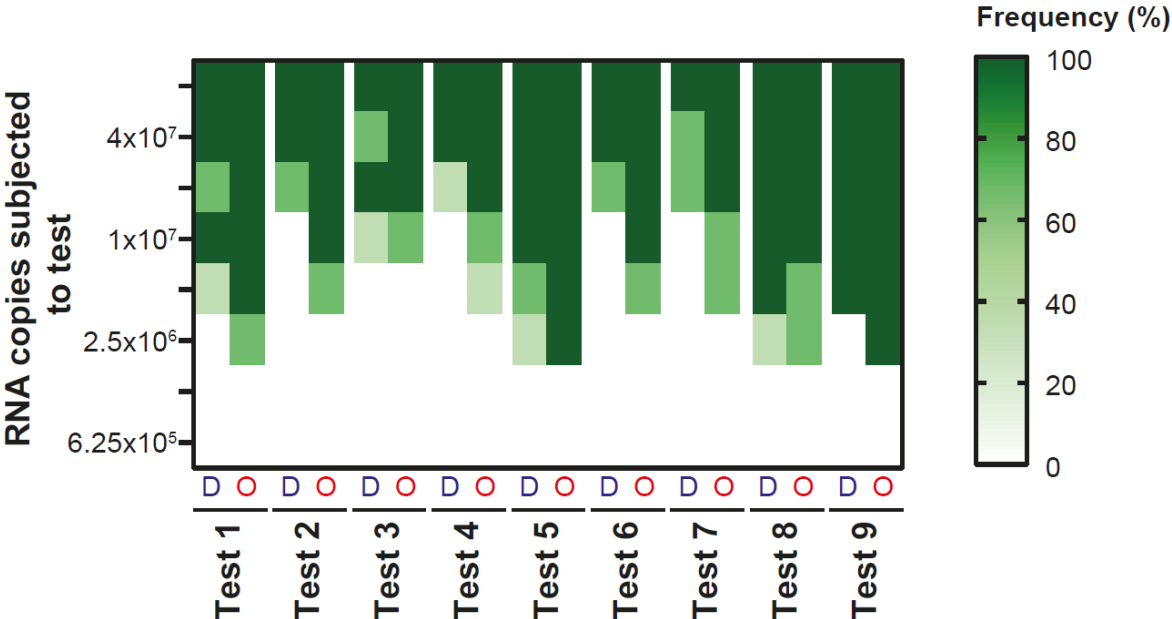

**Suppl. Fig. 1** Heat map of analytical sensitivity of nine SARS-CoV-2 RATs for SARS-CoV-2 variants delta and omicron expanded in cell culture. The visual read of triplicate samples were plotted against the calculated viral RNA copies subjected to the test. Dark green: Positive RAT result; Light green: Replicate mixed result; White: Negative RAT result. D: delta; O: omicron.

## Supplemental Tables

**Suppl. Table 1** Summary of non-synonymous amino acid substitutions in the SARS-CoV-2 nucleocapsid protein with >75% prevalence in publically available VoC sequences compared to the original Wuhan-hu-1 sequence [13].

| Amino acid position | D3 | P13  | DEL31/33 | D63 | P80 | R203 | G204 | T205 | G215 | A220 | S235 | D377 | S413 |
|---------------------|----|------|----------|-----|-----|------|------|------|------|------|------|------|------|
| Alpha (B.1.1.7)     | L  |      |          |     |     | K    | R    |      |      |      | F    |      |      |
| Beta (B.1.351)      |    |      |          |     |     |      |      | I    |      |      |      |      |      |
| Gamma (P.1)         |    |      |          |     | R   | K    | R    |      |      |      |      |      |      |
| Delta (B.1.617.2)   |    |      |          | G   |     | M    |      |      | C    |      |      | Y    |      |
| Omicron (BA.1)      | L  | del* |          |     |     | K    | R    |      |      |      |      |      |      |
| Omicron (BA.2)      | L  | del* |          |     |     | K    | R    |      |      |      |      |      | R    |

\*deletion



| <b>Recommended material</b>                                         | Nasopharyngeal swab                                | Nasal swab         | Nasal swab                | Nasopharyngeal swab                          | Nasal swab         | Nasal swab                  | Nasopharyngeal swab                                   | Nasal swab                 | Nasal swab                                            |
|---------------------------------------------------------------------|----------------------------------------------------|--------------------|---------------------------|----------------------------------------------|--------------------|-----------------------------|-------------------------------------------------------|----------------------------|-------------------------------------------------------|
| <b>PEI evaluated (31.01.22)</b>                                     | yes (as professional test)                         | yes (as self-test) | yes <sup>§</sup>          | yes (as self-test)                           | yes (as self-test) | yes* (as professional test) | yes* (as self-test)                                   | yes (as professional test) | no                                                    |
| <b>Intended by the manufacturer for self-testing ("self-tests")</b> | no - intended for professional use ("rapid tests") | yes                | yes                       | yes                                          | yes                | yes                         | yes                                                   | yes                        | yes                                                   |
| Manufacturer Sensitivity                                            | 94%                                                | 95,37%             | 97,33%                    | relative: 96.72%                             | 95%                | 97,20%                      | 93,75                                                 | 96,19%                     | 96,19%                                                |
| Manufacturer Specificity                                            | 100%                                               | 99,13%             | 99,33%                    | relative: 99.22%                             | 99%                | 100%                        | 98,04                                                 | 99,20%                     | 99,20%                                                |
| Manufacturer Limit of detection [TCID <sub>50</sub> ]               | 1.1 x 10 <sup>2</sup> TCID <sub>50</sub> /ml       | -                  | 30 TCID <sub>50</sub> /ml | 1.15 x10 <sup>2</sup> TCID <sub>50</sub> /ml | 0.5ng/ml           | -                           | 1.3 x10 <sup>2</sup> TCID <sub>50</sub> /ml<br>1ng/ml | -                          | 1.3 x10 <sup>2</sup> TCID <sub>50</sub> /ml<br>1ng/ml |

\*listed in the "SARS-CoV-2 antigen rapid diagnostic tests passing the sensitivity criteria" of the Paul-Ehrlich-Institute (date of access: 31.1.22) with different reference Nos. <sup>§ [30]</sup>

**Suppl. Table 3** Determination of assay specificities for nine SARS-CoV-2 RATs using SARS-CoV-2 PCR-negative respiratory swabs

| <b>Assay</b> | <b>Specificity (%)</b> | <b>95% CI (%)</b> |   |     | <b>True negative / total</b> |   |     |
|--------------|------------------------|-------------------|---|-----|------------------------------|---|-----|
| Test 1       | 100                    | 96.71             | - | 100 | 113                          | / | 113 |
| Test 2       | 100                    | 96.74             | - | 100 | 114                          | / | 114 |
| Test 3       | 100                    | 96.74             | - | 100 | 114                          | / | 114 |
| Test 4       | 100                    | 96.65             | - | 100 | 111                          | / | 111 |
| Test 5       | 100                    | 96.77             | - | 100 | 115                          | / | 115 |
| Test 6       | 100                    | 96.34             | - | 100 | 101                          | / | 101 |
| Test 7       | 100                    | 96.74             | - | 100 | 114                          | / | 114 |
| Test 8       | 100                    | 96.74             | - | 100 | 114                          | / | 114 |
| Test 9       | 100                    | 96.53             | - | 100 | 107                          | / | 107 |

Binomial confidence intervals were computed using the Wilson score interval
